# Supplementary material
Source: PubMed Central journal article supplement (PMC3589528)
Supplement: NIHMS430884-supplement-Supporting_Information.pdf [file NIHMS430884-supplement-Supporting_Information.pdf]

Supporting Information

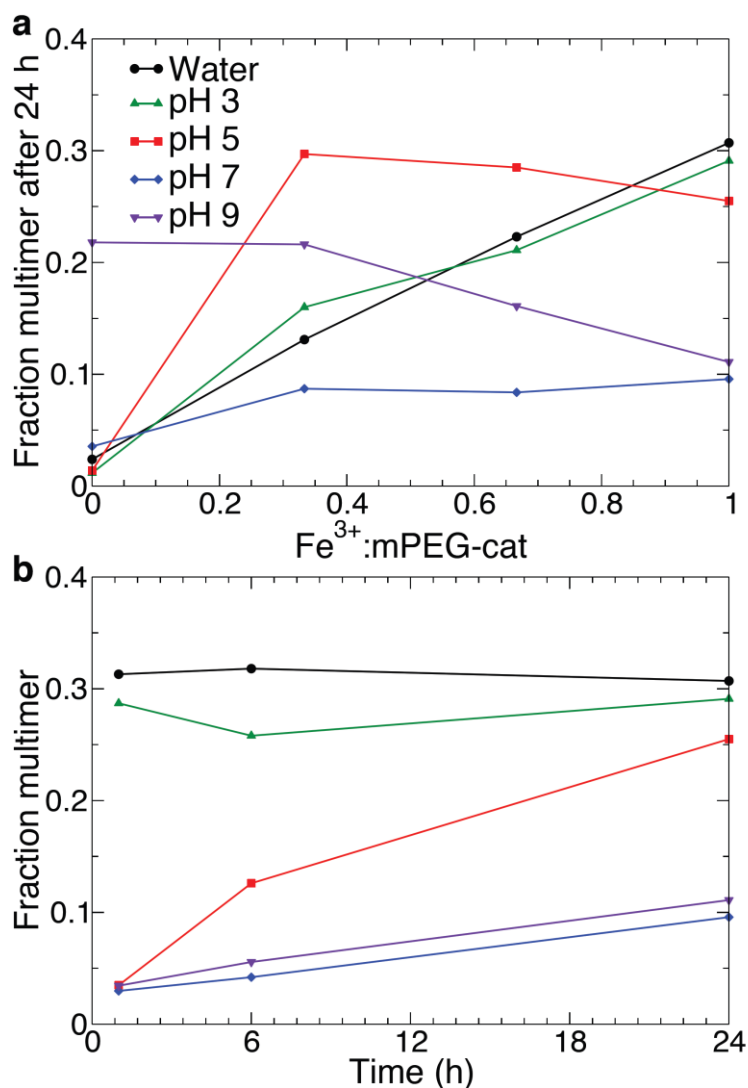

**Figure S1.** Quantification of multimers formed by GPC as function of pH. The monomer fraction was defined as the value of  $[1 - \text{multimer fraction}]$ . (a) Fraction of multimer formed after 24 h. (b) Time-dependence of multimer formation at a 1:1  $Fe^{3+}$ :catechol ratio (legend same as in (a)).

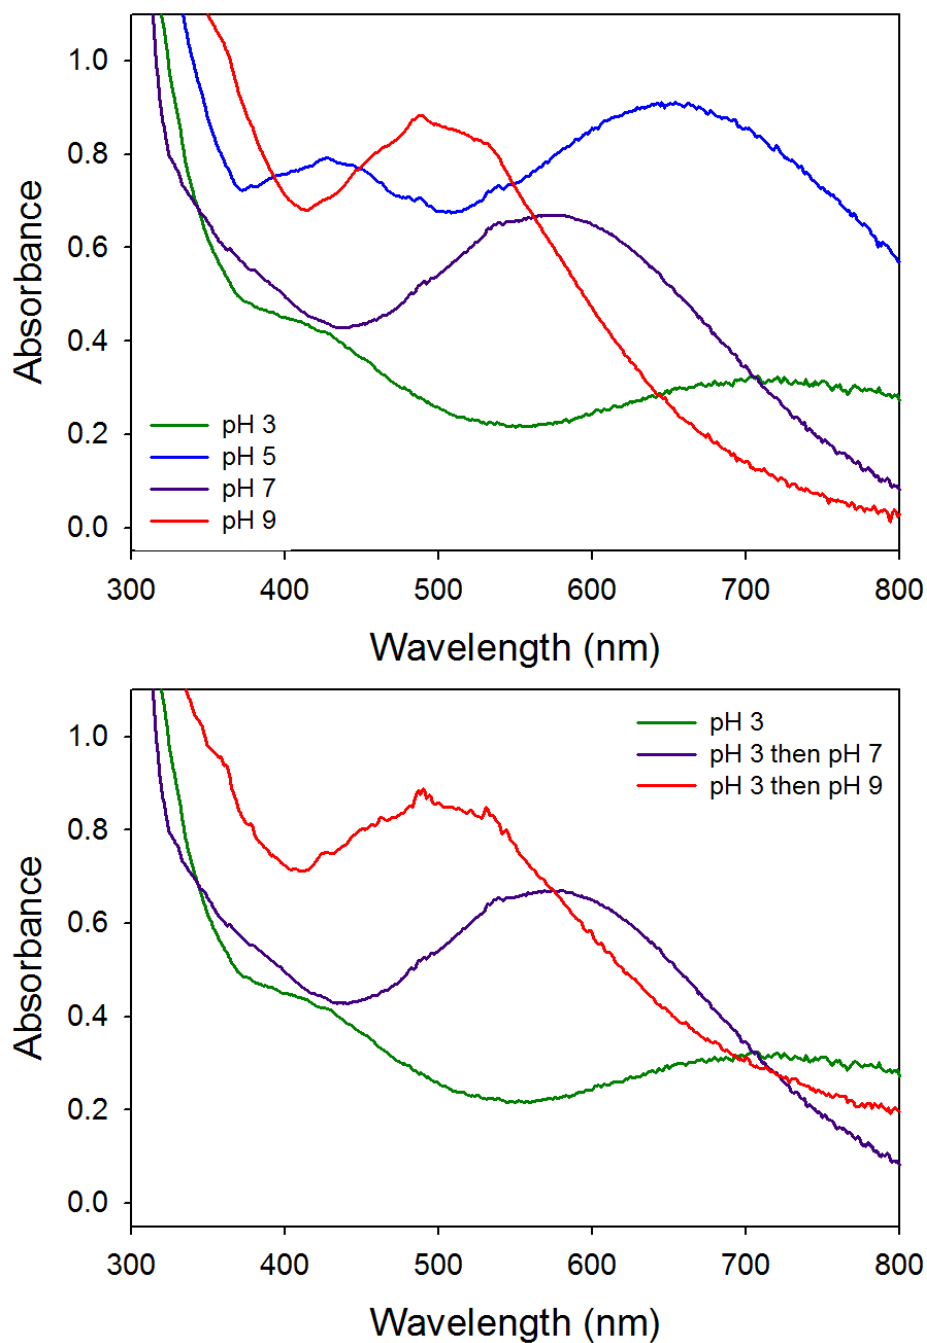

**Figure S2.** UV-visible spectra of solutions of  $\text{Fe}^{3+}$  and mPEG-cat. Spectra of  $\text{Fe}^{3+}$  and mPEG-cat in buffers of various pH (top). Spectra of  $\text{Fe}^{3+}$  and mPEG-cat incubated at pH 3 for 2 h before adjustment to pH 7 or 9 (bottom).

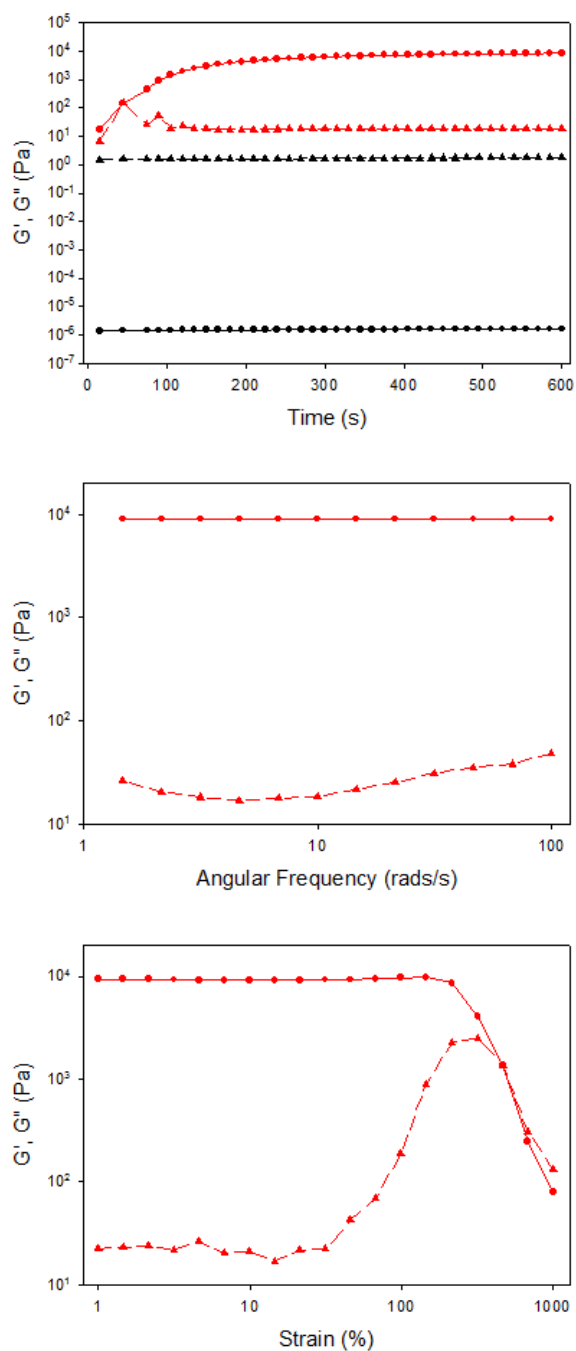

**Figure S3.** Rheometry of gels composed of 8cPEGa in unbuffered water. Gel formation with  $\text{Fe}^{3+}$ :catechol of 2:3 (red) was studied as a function of time (top), frequency (middle) and strain (bottom); as shown in the time sweep,  $\text{Fe}^{3+}$ :catechol of 1:3 (black) does not produce a gel.  $G'$ : solid line with circles;  $G''$ : dashed line with triangles (bottom).

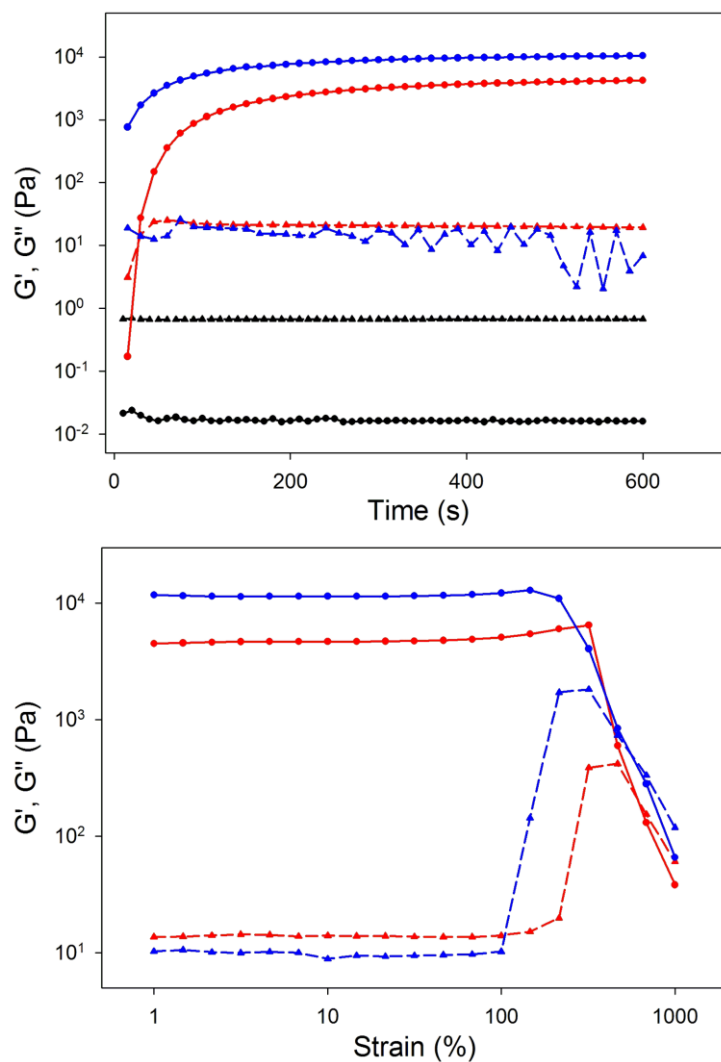

**Figure S4.** Time and strain sweep experiments of gels formed at pH 3 composed of 8cPEGa with  $\text{Fe}^{3+}$ :catechol of 1:3 (black), 2:3 (red), and 3:3 (blue). Gel formation was studied as a function of time (top) and, for gels with  $\text{Fe}^{3+}$ :catechol of 2:3 and 3:3, of strain (bottom) for gels with  $\text{Fe}^{3+}$ :catechol of 2:3 and 3:3.  $G'$ : solid line with circles;  $G''$ : dashed line with triangles.

EDTA (-)

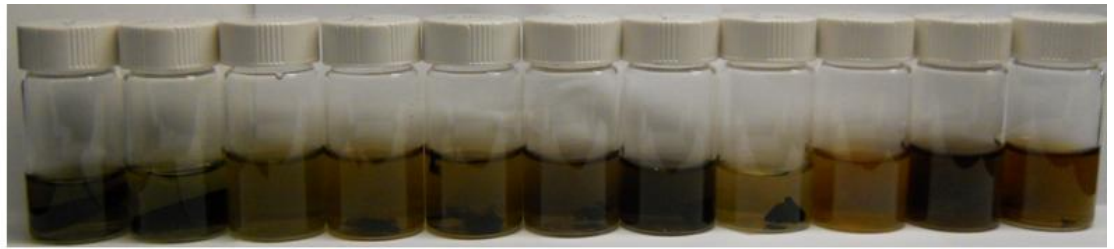

pH

3 3 5 5 5 7 7 7 9 9 9

Fe<sup>3+</sup>:catechol

2:3 3:3 1:3 2:3 3:3 1:3 2:3 3:3 1:3 2:3 3:3

EDTA (+)

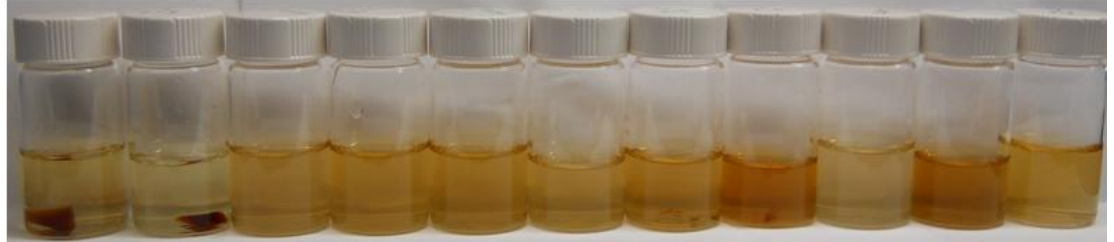

**Figure S5.** Digital images depicting the stability of hydrogels in water and aqueous EDTA.

Gels were formed at the indicated pH values and Fe<sup>3+</sup>:catechol stoichiometries

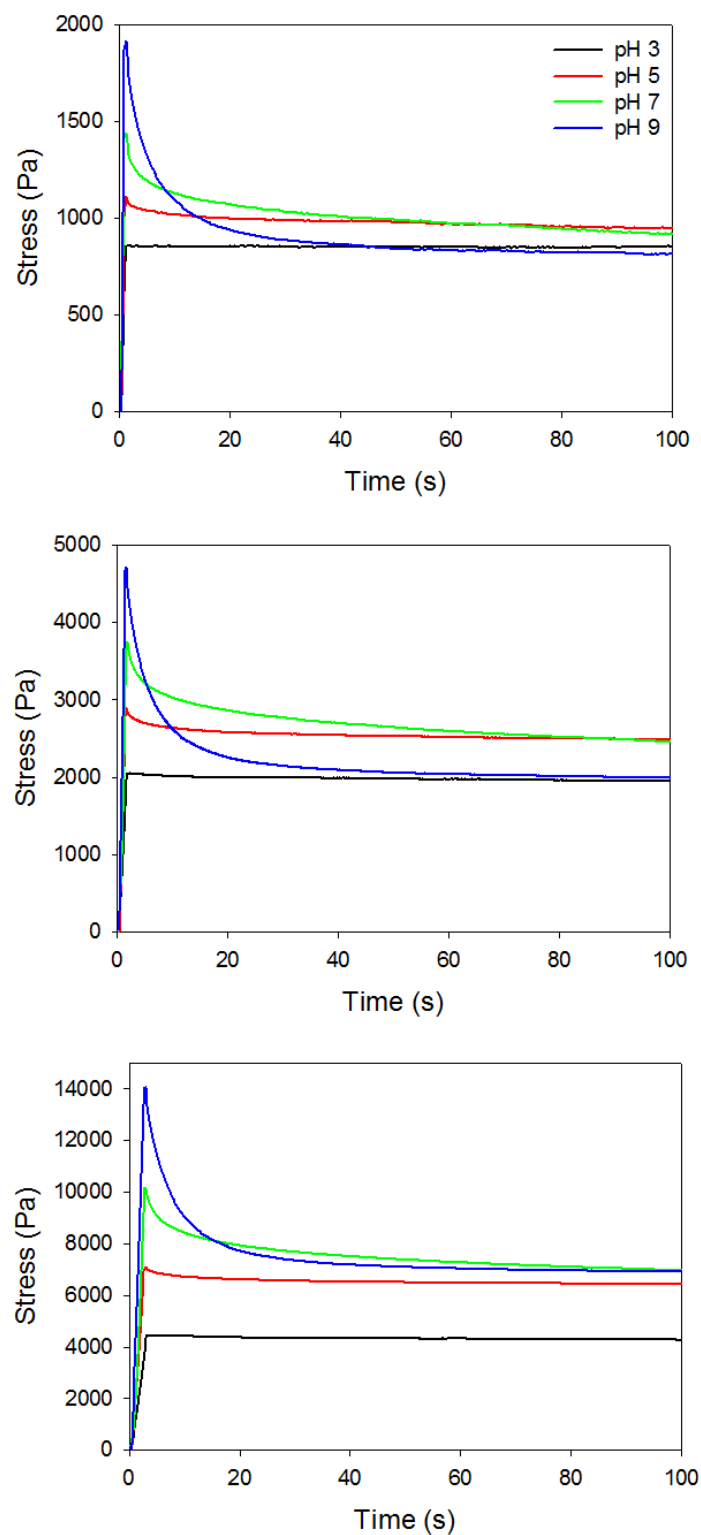

**Figure S6.** pH-dependent relaxation of two-step hydrogels containing covalent and coordination bonds. These samples were strained to 5 % (top), 10 % (middle), or 20 % (bottom) compression, and the stress was monitored for 100 s.

**Table S1.** Measured pH of reaction between Fe<sup>3+</sup> and mPEG-cat

| Fe <sup>3+</sup> :mPEG-cat | pH 3 | pH 5 | pH 7 | pH 9 |
|----------------------------|------|------|------|------|
| 1:3                        | 3.0  | 5.1  | 6.6  | 8.6  |
| 2:3                        | 2.7  | 4.8  | 6.3  | 8.2  |
| 3:3                        | 2.5  | 4.7  | 6.1  | 8.0  |

**Table S2.** Gel times associated with one-step cross-linking of 8cPEGa by Fe<sup>3+</sup>

| Fe <sup>3+</sup> :catechol | Water | pH 3 | pH 5 | pH 7      | pH 9      |
|----------------------------|-------|------|------|-----------|-----------|
| 1:3                        | NA    | NA   | NA   | immediate | immediate |
| 2:3                        | 50 s  | 85 s | NA   | immediate | immediate |
| 3:3                        | 20 s  | 45 s | NA   | immediate | immediate |

Gel formation assessed by vial inversion method. NA = no gel formed within 60 minutes.

**Table S3.** Stability of Fe<sup>3+</sup>-8cPEGa gels incubated in water or EDTA solution after 24 h

| Solvent                 | Fe <sup>3+</sup> :catechol | pH 3   | pH 5            | pH 7            | pH 9            |
|-------------------------|----------------------------|--------|-----------------|-----------------|-----------------|
| Water                   | 1:3                        | NA*    | Unstable        | Mostly Stable   | Unstable        |
|                         | 2:3                        | Stable | Mostly Unstable | Mostly Stable   | Unstable        |
|                         | 3:3                        | Stable | Mostly Stable   | Stable          | Mostly Unstable |
| 100 mM EDTA<br>in Water | 1:3                        | NA     | Unstable        | Mostly Unstable | Unstable        |
|                         | 2:3                        | Stable | Unstable        | Mostly Unstable | Unstable        |
|                         | 3:3                        | Stable | Unstable        | Mostly Unstable | Unstable        |

1.5 h allowed for gel formation. \*NA: gel does not form within 20 minutes

**Table S4.** Physical Characterization of Two-Step Hybrid Gels After Equilibration

|                                                           |                    | <b>pH 3</b>     | <b>pH 5</b>             | <b>pH 7</b>              | <b>pH 9</b>              |
|-----------------------------------------------------------|--------------------|-----------------|-------------------------|--------------------------|--------------------------|
| <b>Color</b>                                              |                    | yellow-brown    | black                   | black                    | black                    |
| <b>Swelling (%)</b>                                       |                    | 159.8 ± 3.8     | 108.7 ± 6.7             | 98.3 ± 1.3               | 88.8 ± 8.3               |
| <b>Initial Modulus (kPa)<sup>a</sup></b>                  |                    | 8.7 ± 5.6       | 18.8 ± 4.6              | 47.8 ± 6.9               | 39.5 ± 2.8               |
| <b>Initial Modulus (kPa)<sup>b</sup></b>                  | <b>5 % strain</b>  | 15.8 ± 4.7      | 25.8 ± 3.6              | 24.4 ± 3.8               | 55.4 ± 9.4               |
|                                                           | <b>10 % strain</b> | 18.7 ± 3.9      | 33.0 ± 2.5              | 38.8 ± 4.5               | 60.4 ± 9.2               |
|                                                           | <b>20 % strain</b> | 21.2 ± 4.0      | 37.5 ± 2.2              | 55.3 ± 3.9               | 66.6 ± 9.7               |
| <b>Steady State Modulus (kPa)<sup>c</sup></b>             | <b>5 % strain</b>  | 15.4 ± 4.4      | 18.7 ± 2.1              | 12.2 ± 2.7               | 22.7 ± 3.6               |
|                                                           | <b>10 % strain</b> | 17.3 ± 3.8      | 24.6 ± 1.8              | 19.2 ± 2.4               | 25.6 ± 4.7               |
|                                                           | <b>20 % strain</b> | 19.2 ± 3.9      | 31.0 ± 1.3              | 31.6 ± 2.0               | 30.6 ± 4.6               |
| <b>Relaxation (%)<sup>d</sup></b>                         | <b>5 % strain</b>  | -- <sup>f</sup> | 13.6 ± 1.1 <sup>g</sup> | 35.9 ± 1.2 <sup>g</sup>  | 55.3 ± 0.7 <sup>g</sup>  |
|                                                           | <b>10 % strain</b> | -- <sup>f</sup> | 13.3 ± 0.9              | 35.5 ± 1.6               | 56.1 ± 1.4               |
|                                                           | <b>20 % strain</b> | -- <sup>f</sup> | 9.7 ± 0.8               | 32.3 ± 1.2               | 51.2 ± 0.6               |
| <b>Relaxation Time, <math>\tau</math> (s)<sup>e</sup></b> | <b>5 % strain</b>  | -- <sup>f</sup> | 218 ± 56 <sup>g</sup>   | 58.4 ± 40.4 <sup>g</sup> | 4.9 ± 0.3 <sup>g</sup>   |
|                                                           | <b>10 % strain</b> | -- <sup>f</sup> | 12 ± 1                  | 37.4 ± 6.9               | 4.5 ± 0.2                |
|                                                           | <b>20 % strain</b> | -- <sup>f</sup> | 25 ± 16                 | 18.4 ± 0.4               | 4.9 ± 0.2                |
| <b><math>\alpha^e</math></b>                              | <b>5 % strain</b>  | -- <sup>f</sup> | 0.3 ± 0.02 <sup>g</sup> | 0.30 ± 0.04 <sup>g</sup> | 0.62 ± 0.03 <sup>g</sup> |
|                                                           | <b>10 % strain</b> | -- <sup>f</sup> | 0.4 ± 0.05              | 0.35 ± 0.01              | 0.64 ± 0.003             |
|                                                           | <b>20 % strain</b> | -- <sup>f</sup> | 0.38 ± 0.02             | 0.39 ± 0.02              | 0.67 ± 0.004             |

<sup>a</sup> initial modulus calculated from slope of linear portion of stress-strain curves (from compression loops) with cross-head speed of 10 mm/min; <sup>b</sup> initial modulus calculated from slope of linear portion of stress-strain curves (from relaxation tests) with cross-head speed of 40 mm/min; <sup>c</sup> steady-state modulus ( $A_1/\epsilon_{100}$ ) calculated from fit of relaxation tests; <sup>d</sup> percent stress relaxed after 100 s; <sup>e</sup> calculated from fit of relaxation tests by expanded exponential model; <sup>f</sup> relaxation data were not calculated for materials equilibrated to pH 3 because of the absence of coordination bonds; <sup>g</sup> larger error for calculations associated with 5 % strain were due to the significance of instrumental drift.
